# Supplementary material for: All-acrylic superelastomers: facile synthesis and exceptional mechanical behavior
Source: Royal Society of Chemistry journal article supplement (doi:10.1039/c7py01518f), 2017-10-17
Supplement: c7py01518f1.pdf [file c7py01518f1.pdf]

## Supporting Information

### All-Acrylic Superelastomers: Facile Synthesis and Exceptional Mechanical Behavior

Wei Lu<sup>a</sup>, Andrew Goodwin<sup>a</sup>, Yangyang Wang<sup>b</sup>, Panchao Yin<sup>c</sup>, Weiyu Wang<sup>b</sup>, Jiahua Zhu<sup>b</sup>, Ting Wu<sup>d</sup>, Xinyi Lu<sup>a</sup>, Bin Hu<sup>d</sup>, Kunlun Hong<sup>\*,b</sup>, Nam-Goo Kang<sup>\*,a</sup>, and Jimmy Mays<sup>\*,a</sup>

<sup>a</sup>Department of Chemistry, University of Tennessee, Knoxville, Tennessee 37996, United States

<sup>b</sup>Center for Nanophase Materials Sciences, Oak Ridge National Laboratory, Oak Ridge, Tennessee 37831, United States

<sup>c</sup>Chemical and Engineering Materials Division, Neutron Sciences Directorate, Oak Ridge National Laboratory, Oak Ridge, Tennessee 37831, United States

<sup>d</sup>Department of Materials Science and Engineering, University of Tennessee, Knoxville, Tennessee 37996, United States

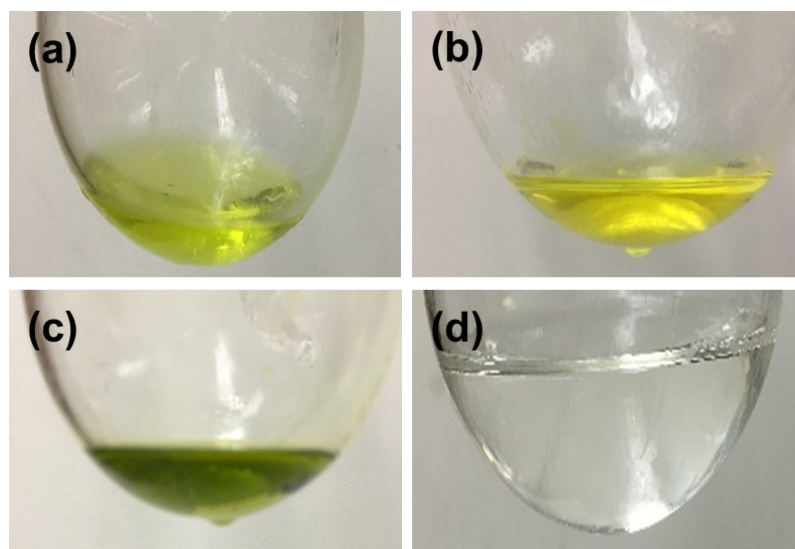

**Figure S1.** Reaction solutions on the synthesis of PMMA macromonomer: (a) activation of PVBA by *sec*-BuLi upon mixing; (b) the completion of the activation of PVBA by *sec*-BuLi; (c) formation of a complex between LiCl and nitrogen anion; (d) Solutions of living PMMA.

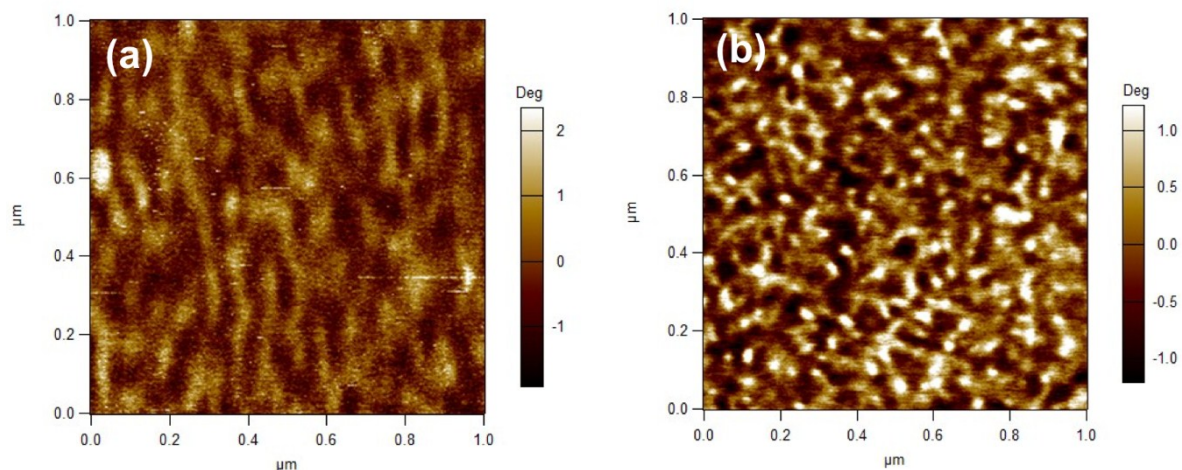

**Figure S2.** AFM phase images of (a) MG-8.4-3.3-8.6 and MG-18.1-2.8-18.4

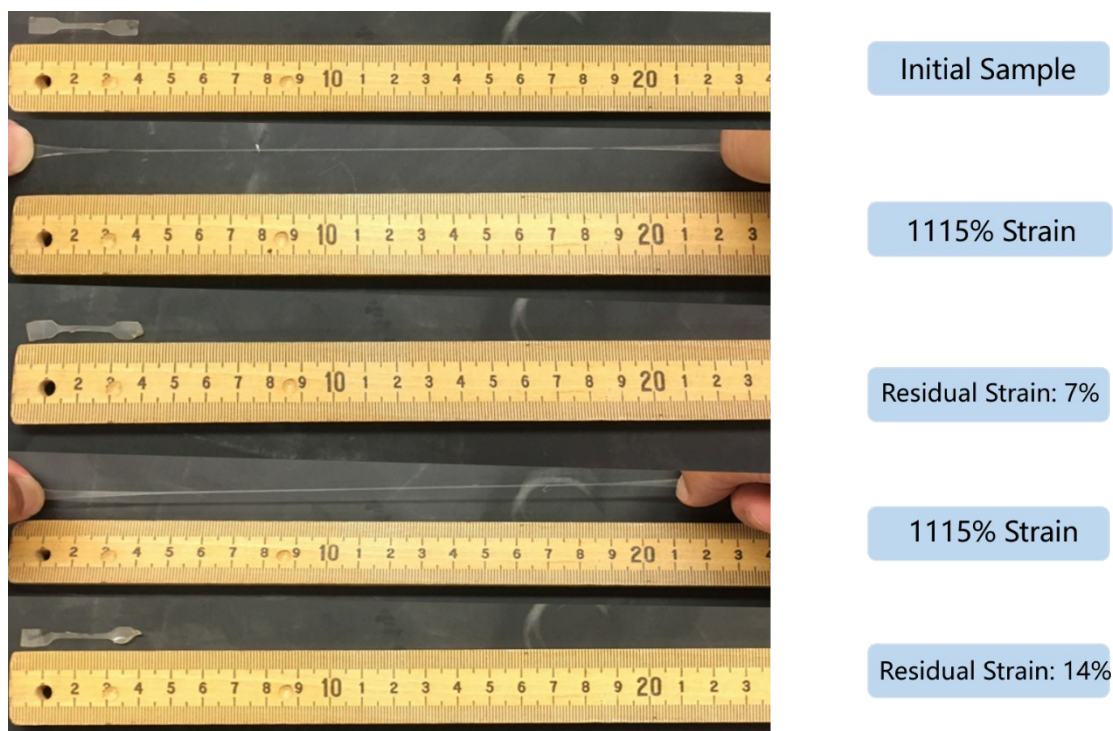

**Figure S3.** Photographs of the multiple hysteresis tests of MG-29.3-1.5-9.3. From top to bottom are: Initial sample with a gauge length of 14 mm; sample stretched to 170 mm with around 1115% strain; recovered sample with a gauge length of around 15 mm; sample stretched the second time to 170 mm with around 1115% strain; recovered sample with a gauge length of around 16 mm.

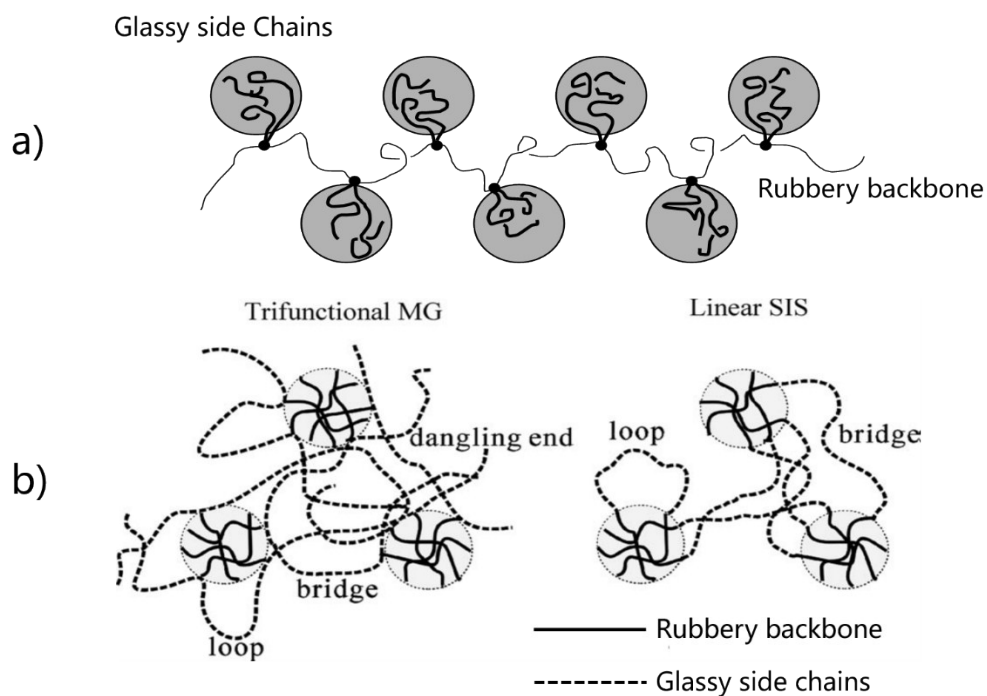

**Figure S4.** a) Schematic structure of multigraft copolymers.<sup>1</sup> b) Difference in molecular architecture and conformation between multigraft copolymers and linear triblock copolymers using SIS as an example.<sup>2</sup>

## References

- (1) Weidisch, R.; Gido, S.; Uhrig, D.; Iatrou, H.; Mays, J.; Hadjichristidis, N., *Macromolecules* **2001**, *34* (18), 6333-6337.
- (2) Duan, Y.; Rettler, E.; Schneider, K.; Schlegel, R.; Thunga, M.; Weidisch, R.; Siesler, H. W.; Stamm, M.; Mays, J. W.; Hadjichristidis, N., *Macromolecules* **2008**, *41* (13), 4565-4568.
